# Supplementary material
Source: Research Square preprint supplement (doi:10.21203/rs.3.rs-8847825/v1)
Supplement: Supplementary file 1 [file 84fb8eb5a8b62074c71b71d7.docx]

**Supplementary Table 2. Intra-class correlation coefficients (95% CIs) of YPAQ repeat measures by intensity, age group, and weight status of children, (n = 252).**

| **Activity**  **Intensity** | **Age 9-11 yr.**  **n = 108**  **ICC (95% CI)** | **Age 12-14 yr.**  **n = 144**  **ICC (95% CI)** | **Normal Weight**  **n = 198**  **ICC (95% CI)** | **Overweight**  **n = 38**  **ICC (95% CI)** |
| --- | --- | --- | --- | --- |
| MVPA$ | 0.66 (0.54-0.76)** | 0.79 (0.73-0.84)* | 0.74 (0.70-0.78)* | 0.69 (0.51-0.82)** |
| Sedentary | 0.75 (0.65-0.82)* | 0.79 (0.73-0.84)* | 0.68 (0.63-0.72)** | 0.76 (0.59-0.86)** |
| Light | 0.62 (0.50-0.71)** | 0.75 (0.68-0.81)* | 0.77 (0.73-0.81)* | 0.80 (0.65-0.89)* |
| Total | 0.51 (0.38-0.63)** | 0.68 (0.61-0.74)** | 0.61 (0.57-0.65)** | 0.67 (0.44-0.82)** |

YPAQ reported activity intensity thresholds METs: <1.5 for sedentary, <3 for light, <6 for moderate, and ≥6 for vigorous activities. $MVPA = Moderate and Vigorous Physical Activities.

The p-values for within- and between-group differences were calculated against the hypothesized ICC ≥0.70 using Fisher’s z-transformation. Single asterisk (*) indicates coefficients significantly above the reference value; doubleasterisk (**) indicates coefficients significantly below the reference value.
