# Supplementary material
Source: Research Square preprint supplement (doi:10.21203/rs.3.rs-8847825/v1)
Supplement: Supplementary file 2 [file 860badaedbd8f29c3449db07.docx]

**Supplementary Table 1. Correlation coefficients (95% CIs) between YPAQ and Actigraph measured activities by PA intensity age group and weight status, (n = 234)**

| **Activity**  **Intensity** | **Age 9-11 yr.**  **n = 101**  **r (95% CI)** | **Age 12-14 yr.**  **n = 133**  **r (95% CI)** | **Normal Weight**  **n = 198**  **r (95% CI)** | **Overweight**  **n = 36**  **r (95% CI)** |
| --- | --- | --- | --- | --- |
| MVPA$ | 0.32 (0.16-0.46)* | 0.40 (0.28-0.51)* | 0.39 (0.31-0.51)* | 0.26 (-0.08-0.56)** |
| Sedentary | 0.16 (0.00-0.31)** | 0.10 (-0.05-0.25)** | 0.13 (0.04-0.21)** | 0.10 (-0.13-0.32)** |
| Light | 0.06 (-0.10-0.21)** | 0.01 (-0.13-0.15)** | -0.01 (-0.10-0.08)** | 0.21 (0.02-0.39)** |
| Total | 0.22 (0.07-0.36)** | 0.06 (-0.08-0.19)** | 0.14 (0.05-0.22)** | 0.06 (-0.14-0.26)** |

YPAQ reported activity intensities thresholds METs: <1.5 for sedentary, <3 for light, <6 for moderate and ≥6 for vigorous activities. Actigraph activity intensities thresholds counts/min: <100 for sedentary, <2295 for light, <4012 for moderate and ≥4012 for vigorous activities; $MVPA= Moderate and vigorous physical activities.

The p-values for within- and between-group differences were calculated against the hypothesized r ≥0.30 using Fisher’s z-transformation. Single asterisk (*) indicates coefficients significantly above the reference value; doubleasterisk (**) indicates coefficients significantly below the reference value.
